# Supplementary material for: GhGLK1 a Key Candidate Gene From GARP Family Enhances Cold and Drought Stress Tolerance in Cotton
Source: Front Plant Sci. 2021 Dec 16;12:759312. doi: 10.3389/fpls.2021.759312 (PMC8725998; doi:10.3389/fpls.2021.759312)
Supplement: Supplementary file 2 [file Table_2.XLS]

## Sheet: Germination
Lines	Treatment	Replication	No of planted	No of germinated	Germination rate (%)
WT	CK	I	45	45	100
WT	CK	II	45	45	100
WT	CK	III	45	45	100
WT	Drought	I	45	22	49
WT	Drought	II	45	20	44
WT	Drought	III	45	18	40
WT	Cold	I	45	30	67
WT	Cold	II	45	33	73
WT	Cold	III	45	27	60
OE-5	CK	I	45	45	100
OE-5	CK	II	45	45	100
OE-5	CK	III	45	45	100
OE-5	Drought	I	45	31	69
OE-5	Drought	II	45	34	76
OE-5	Drought	III	45	37	82
OE-5	Cold	I	45	43	96
OE-5	Cold	II	45	41	91
OE-5	Cold	III	45	40	89
OE-14	CK	I	45	45	100
OE-14	CK	II	45	45	100
OE-14	CK	III	45	45	100
OE-14	Drought	I	45	23	51
OE-14	Drought	II	45	25	56
OE-14	Drought	III	45	19	42
OE-14	Cold	I	45	44	98
OE-14	Cold	II	45	42	93
OE-14	Cold	III	45	39	87
OE-16	CK	I	45	45	100
OE-16	CK	II	45	45	100
OE-16	CK	III	45	45	100
OE-16	Drought	I	45	37	82
OE-16	Drought	II	45	35	78
OE-16	Drought	III	45	28	62
OE-16	Cold	I	45	44	98
OE-16	Cold	II	45	42	93
OE-16	Cold	III	45	41	91

## Sheet: Root length
Lines	Treatment	Replication	Root lengh (mm)
WT	CK	I	24.3
WT	CK	II	27.1
WT	CK	III	25.7
WT	Drought	I	6.1
WT	Drought	II	7.5
WT	Drought	III	5.2
WT	Cold	I	5.7
WT	Cold	II	5.4
WT	Cold	III	7.1
OE-5	CK	I	27.2
OE-5	CK	II	26.5
OE-5	CK	III	24.3
OE-5	Drought	I	11.2
OE-5	Drought	II	10.5
OE-5	Drought	III	11.8
OE-5	Cold	I	12.2
OE-5	Cold	II	10.9
OE-5	Cold	III	10.8
OE-14	CK	I	25.8
OE-14	CK	II	23.1
OE-14	CK	III	26.8
OE-14	Drought	I	10.3
OE-14	Drought	II	9.9
OE-14	Drought	III	10.4
OE-14	Cold	I	9.9
OE-14	Cold	II	10.5
OE-14	Cold	III	8.1
OE-16	CK	I	26.4
OE-16	CK	II	25.9
OE-16	CK	III	26.4
OE-16	Drought	I	13.2
OE-16	Drought	II	10.9
OE-16	Drought	III	10.8
OE-16	Cold	I	13.2
OE-16	Cold	II	12.1
OE-16	Cold	III	11.3

## Sheet: Survival rate
Lines	Treatment	Replication	No of planted	No of survived	Survival rate (%)
WT	CK	I	45	45	100
WT	CK	II	45	45	100
WT	CK	III	45	45	100
WT	Drought	I	45	1	2
WT	Drought	II	45	3	7
WT	Drought	III	45	7	16
WT	Cold	I	45	6	13
WT	Cold	II	45	8	18
WT	Cold	III	45	2	4
OE-5	CK	I	45	45	100
OE-5	CK	II	45	45	100
OE-5	CK	III	45	45	100
OE-5	Drought	I	45	40	89
OE-5	Drought	II	45	33	73
OE-5	Drought	III	45	37	82
OE-5	Cold	I	45	28	62
OE-5	Cold	II	45	27	60
OE-5	Cold	III	45	32	71
OE-14	CK	I	45	45	100
OE-14	CK	II	45	45	100
OE-14	CK	III	45	45	100
OE-14	Drought	I	45	21	47
OE-14	Drought	II	45	26	58
OE-14	Drought	III	45	19	42
OE-14	Cold	I	45	26	58
OE-14	Cold	II	45	29	64
OE-14	Cold	III	45	31	69
OE-16	CK	I	45	45	100
OE-16	CK	II	45	45	100
OE-16	CK	III	45	45	100
OE-16	Drought	I	45	31	69
OE-16	Drought	II	45	36	80
OE-16	Drought	III	45	29	64
OE-16	Cold	I	45	14	31
OE-16	Cold	II	45	17	38
OE-16	Cold	III	45	20	44
